# Supplementary material for: Seasonal variation of aerosol iron solubility in coarse and fine particles at an inland city in northwestern China
Source: Copernicus journal article supplement (doi:10.5194/acp-23-3543-2023), 2023-03-22
Supplement: Supplementary file 1 [file acp-23-3543-2023-supplement.pdf]

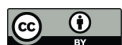

*Supplement of*

## **Seasonal variation of aerosol iron solubility in coarse and fine particles at an inland city in northwestern China**

**Huanhuan Zhang et al.**

*Correspondence to:* Mingjin Tang (mingjintang@gig.ac.cn)

The copyright of individual parts of the supplement might differ from the article licence.

1 **Table S1.** Temperature and relative humidity (RH) in different seasons (spring: 01-30 April 2021;  
2 summer: 12 July-14 August 2021; autumn: 07 October-07 November 2021; winter: 26 November  
3 to 31 December 2020).

| Season | Temperature (°C) |        |          | RH (%) |        |         |
|--------|------------------|--------|----------|--------|--------|---------|
|        | range            | median | average  | range  | median | average |
| Spring | 6.2-32.3         | 13.6   | 14.0±4.6 | 15-99  | 85     | 77±22   |
| Summer | 19.1-38.9        | 27.0   | 27.6±4.0 | 29-97  | 71     | 70±15   |
| Autumn | 0.2-20.4         | 12.7   | 12.6±3.2 | 24-98  | 83     | 80±13   |
| Winter | -11.0-10.1       | 1.3    | 0.9±4.0  | 22-99  | 77     | 74±19   |

4

5

6

7

8 **Table S2.** Mass concentrations of PM<sub>2.5</sub> and PM<sub>10</sub> in different seasons.

| Season | PM <sub>2.5</sub> (µg/m <sup>3</sup> ) |        |         | PM <sub>10</sub> (µg/m <sup>3</sup> ) |        |         |
|--------|----------------------------------------|--------|---------|---------------------------------------|--------|---------|
|        | range                                  | median | average | range                                 | median | average |
| spring | 11-62                                  | 33     | 35±14   | 15-243                                | 85     | 93±61   |
| Summer | 11-48                                  | 23     | 23±8    | 24-76                                 | 55     | 51±16   |
| Autumn | 13-97                                  | 38     | 40±24   | 22-151                                | 69     | 70±35   |
| winter | 13-156                                 | 81     | 80±32   | 41-212                                | 101    | 107±39  |

9

10

11

12

13 **Table S3.** Correlation coefficients (R) for dissolved Fe with other species in different seasons. In  
 14 this table, R values which are >0.5 are highlighted in bold.

|                               | spring       |              | summer       |              | autumn       |              | winter       |              |
|-------------------------------|--------------|--------------|--------------|--------------|--------------|--------------|--------------|--------------|
|                               | coarse       | fine         | coarse       | fine         | coarse       | fine         | coarse       | fine         |
| SO <sub>4</sub> <sup>2-</sup> | <b>0.867</b> | <b>0.651</b> | 0.490        | 0.190        | <b>0.729</b> | <b>0.524</b> | 0.460        | <b>0.899</b> |
| NO <sub>3</sub> <sup>-</sup>  | <b>0.898</b> | <b>0.616</b> | 0.492        | 0.386        | <b>0.791</b> | <b>0.725</b> | <b>0.687</b> | 0.342        |
| NH <sub>4</sub> <sup>+</sup>  | <b>0.899</b> | <b>0.560</b> | 0.352        | 0.190        | <b>0.737</b> | <b>0.704</b> | <b>0.612</b> | 0.250        |
| K <sup>+</sup>                | <b>0.801</b> | <b>0.674</b> | <b>0.610</b> | <b>0.704</b> | <b>0.960</b> | <b>0.730</b> | <b>0.908</b> | <b>0.770</b> |
| Ca <sup>2+</sup>              | 0.333        | <b>0.621</b> | 0.428        | <b>0.721</b> | <b>0.748</b> | <b>0.654</b> | <b>0.721</b> | 0.426        |
| T-Fe                          | 0.031        | 0.232        | 0.248        | <b>0.613</b> | <b>0.675</b> | 0.427        | <b>0.538</b> | 0.304        |
| Al                            | 0.004        | 0.229        | 0.302        | <b>0.508</b> | <b>0.650</b> | <b>0.557</b> | 0.468        | 0.360        |
| As                            | <b>0.630</b> | <b>0.709</b> | 0.467        | 0.459        | <b>0.598</b> | <b>0.628</b> | <b>0.548</b> | 0.315        |
| Cr                            | <b>0.509</b> | 0.292        | 0.355        | 0.051        | <b>0.568</b> | 0.384        | <b>0.772</b> | 0.348        |
| Cu                            | 0.421        | 0.298        | -0.029       | 0.310        | -0.197       | -0.288       | 0.004        | -0.127       |
| Mn                            | 0.365        | 0.240        | 0.276        | <b>0.599</b> | <b>0.673</b> | <b>0.651</b> | <b>0.672</b> | 0.336        |
| Ni                            | 0.355        | 0.169        | 0.114        | 0.327        | 0.086        | -0.169       | <b>0.782</b> | 0.318        |
| Pb                            | <b>0.651</b> | <b>0.712</b> | 0.173        | 0.086        | <b>0.880</b> | <b>0.636</b> | <b>0.740</b> | <b>0.660</b> |
| V                             | 0.230        | 0.210        | 0.267        | <b>0.568</b> | <b>0.724</b> | 0.321        | <b>0.654</b> | 0.286        |
| Zn                            | <b>0.693</b> | 0.463        | 0.260        | 0.212        | <b>0.571</b> | <b>0.769</b> | <b>0.626</b> | 0.231        |

15

16

17

18 **Table S4.** The range, median and average of pH for fine and coarse particles in different seasons.

| pH     | fine      |        |           | coarse    |        |           |
|--------|-----------|--------|-----------|-----------|--------|-----------|
|        | range     | median | average   | range     | median | average   |
| Spring | 2.74-7.33 | 3.64   | 4.67±2.00 | 2.33-7.33 | 3.38   | 4.59±2.08 |
| Summer | 2.00-7.09 | 2.74   | 3.59±1.90 | 2.17-7.09 | 2.99   | 3.93±1.92 |
| Autumn | 1.33-3.43 | 3.13   | 2.98±0.46 | 2.27-3.58 | 2.79   | 2.84±0.29 |
| Winter | 1.62-7.58 | 4.15   | 4.23±0.89 | 3.46-7.74 | 4.16   | 5.15±1.72 |

19

20

21

22

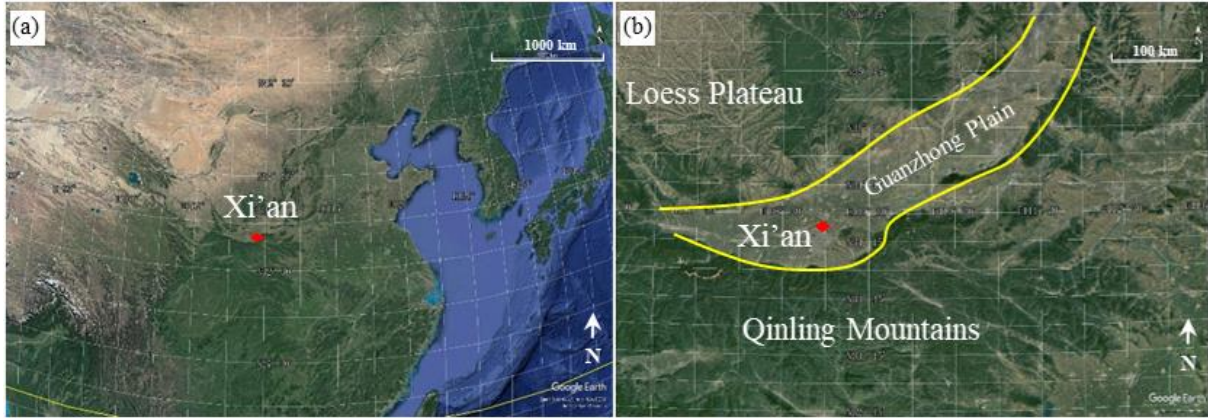

23

24 **Figure S1.** (a) A map which shows the location of Xi'an in China; (b) A map which shows Xi'an,  
25 the Guanzhong Plain, Qinling Mountains, and Loess Plateau.

26

27

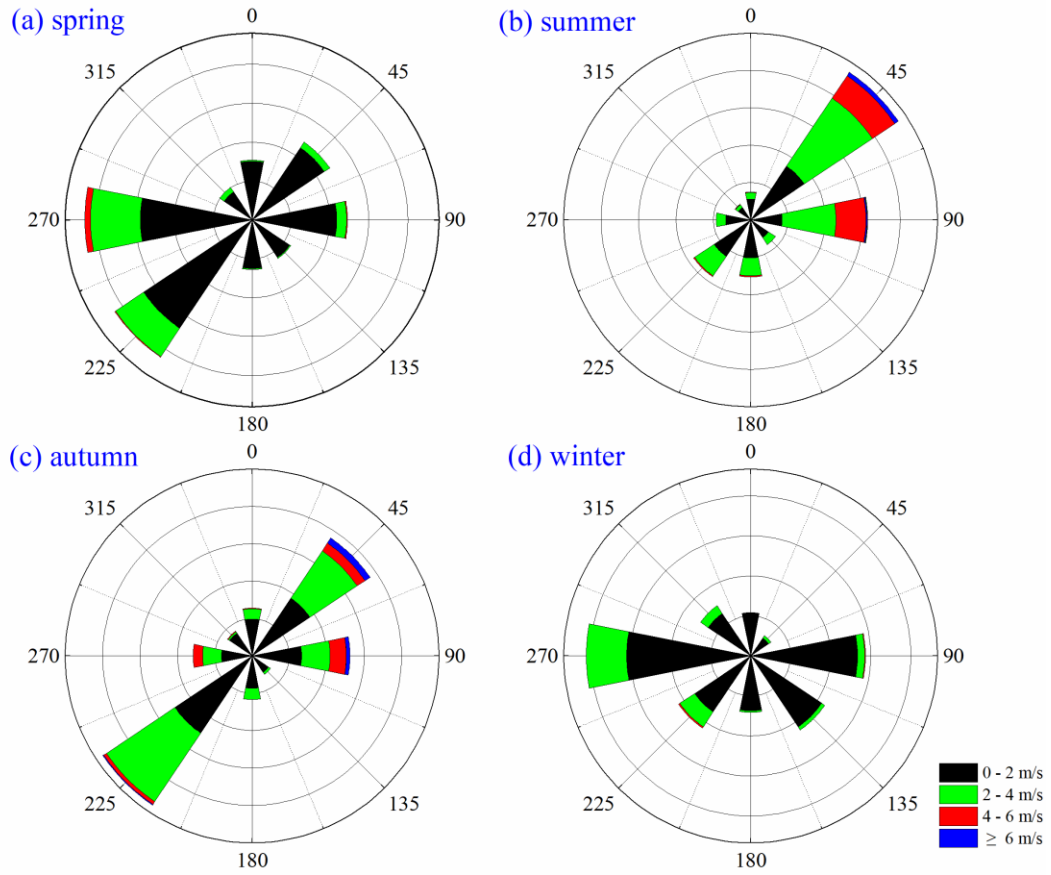

28

29 **Figure S2.** Wind rose which displays wind directions and speeds during the campaign: (a)

30 spring; (b) summer; (c) autumn; (d) winter.

31

32

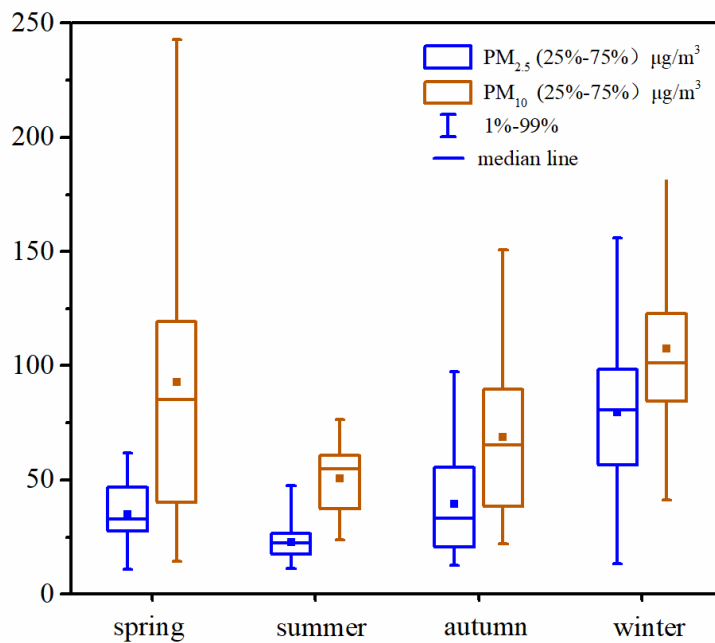

33

34 **Figure S3.** Mass concentrations of PM<sub>2.5</sub> and PM<sub>10</sub> in different seasons.

35

36



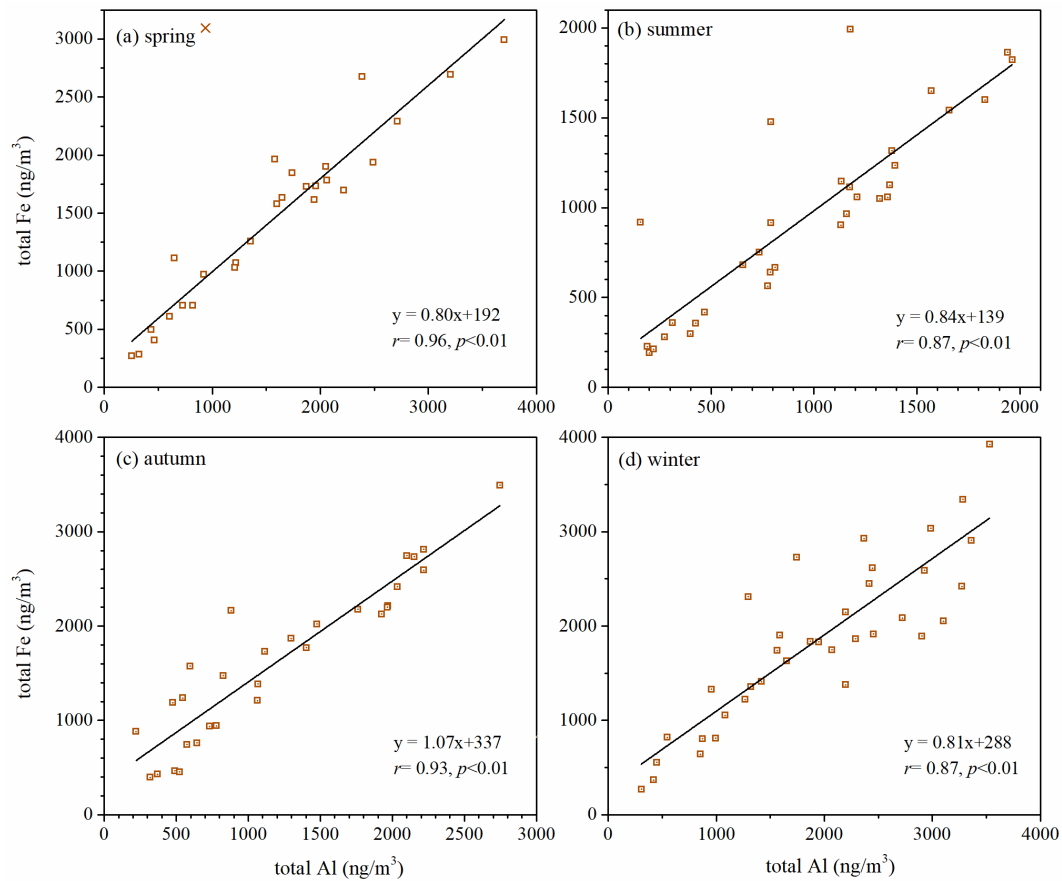

37

38 **Figure S4.** Correlations between total Fe and total Al for coarse particles in different seasons: (a)

39 spring; (b) summer; (c) autumn; (d) winter.

40

41

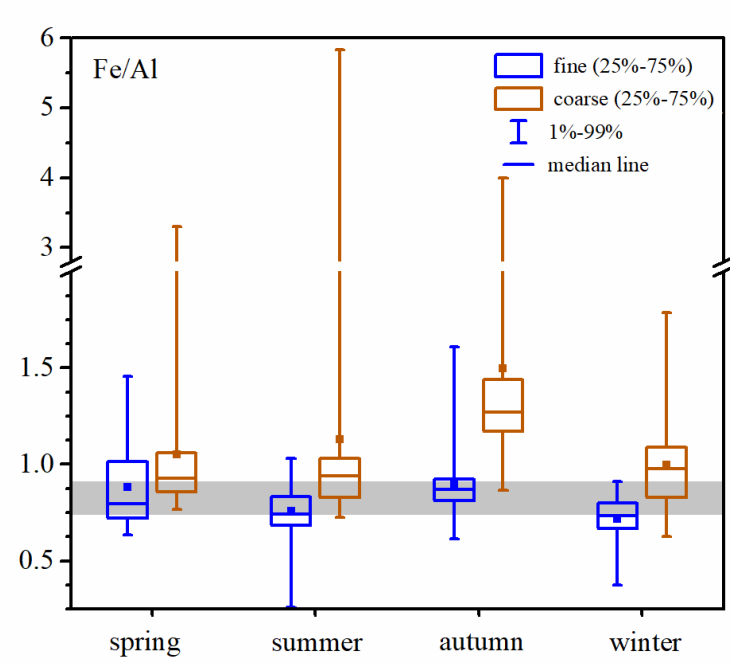

42

43 **Figure S5.** Mass ratios of total Fe to total Al, Fe/Al, for fine and coarse particles in different

44 seasons.

45

46

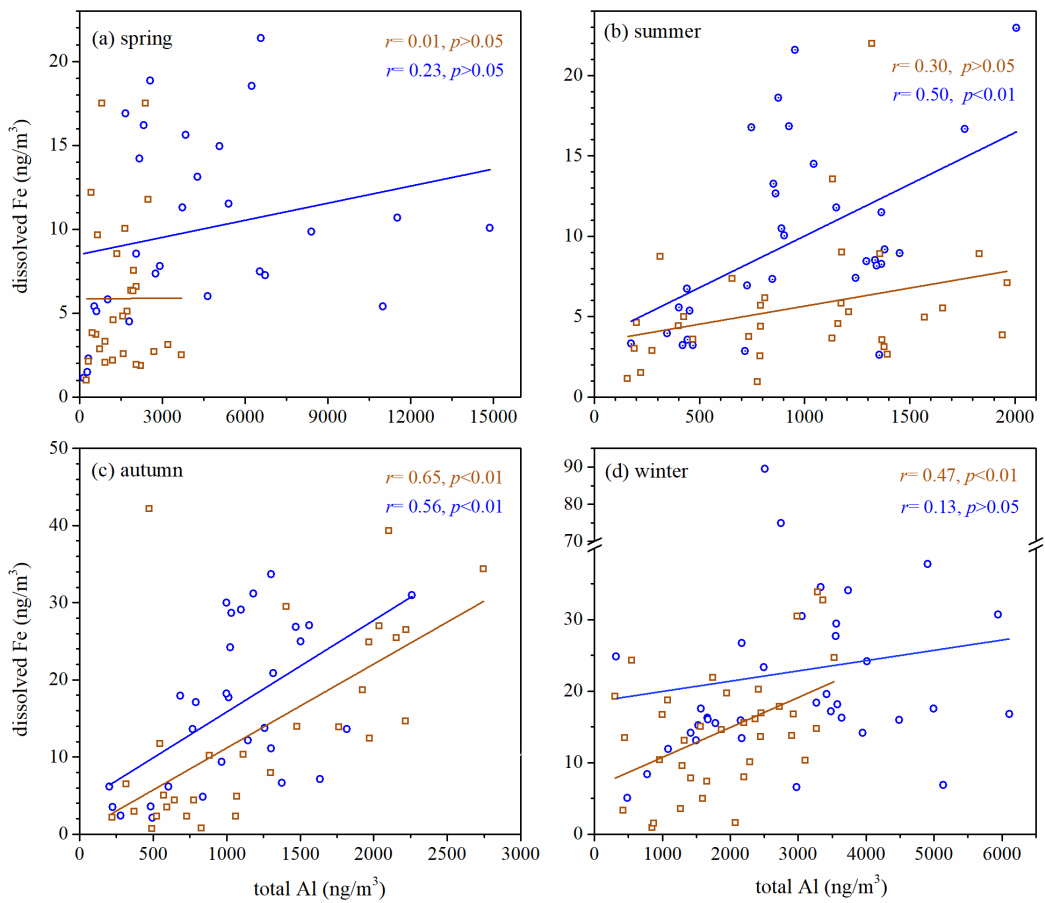

47

48 **Figure S6.** Dissolved Fe versus total Al for fine and coarse particles in different seasons: (a)

49 spring; (b) summer; (c) autumn; (d) winter.

50

51

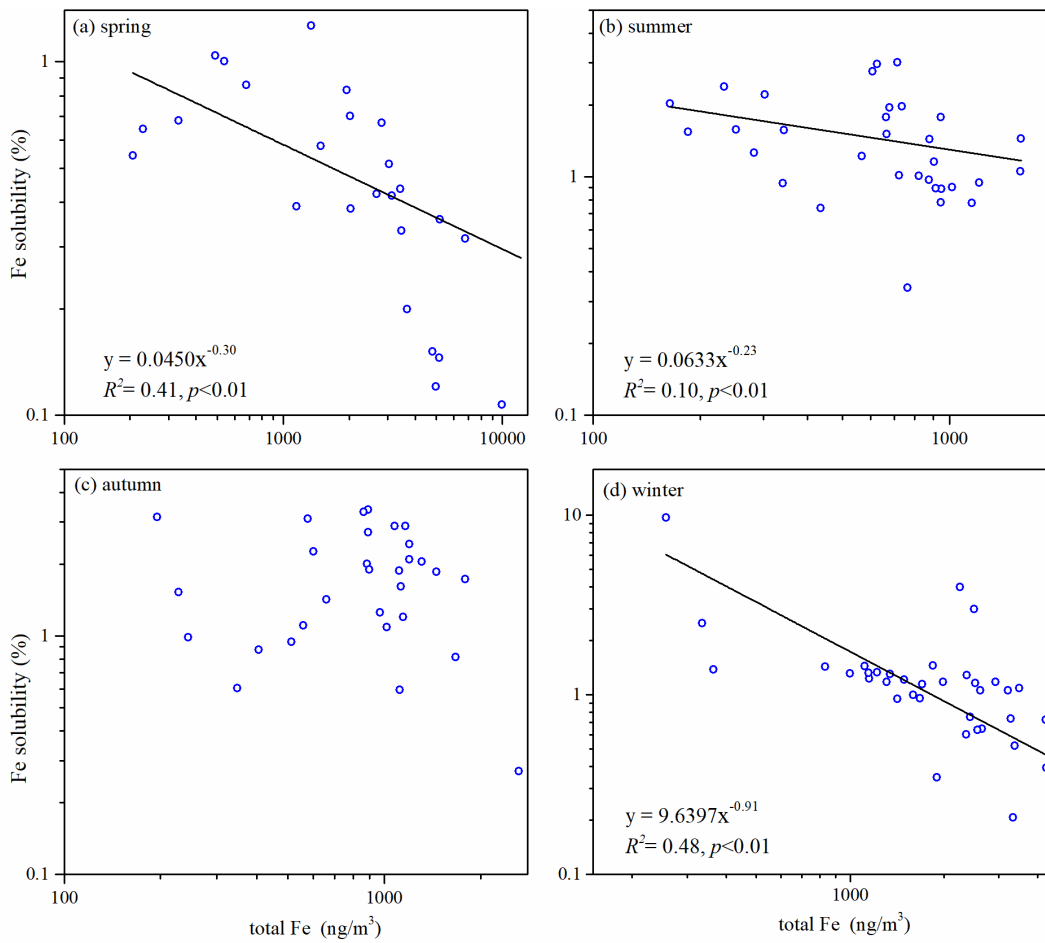

52

53 **Figure S7.** Fe solubility versus total Fe for fine particles in different seasons: (a) spring; (b)

54 summer; (c) autumn; (d) winter.

55

56

57

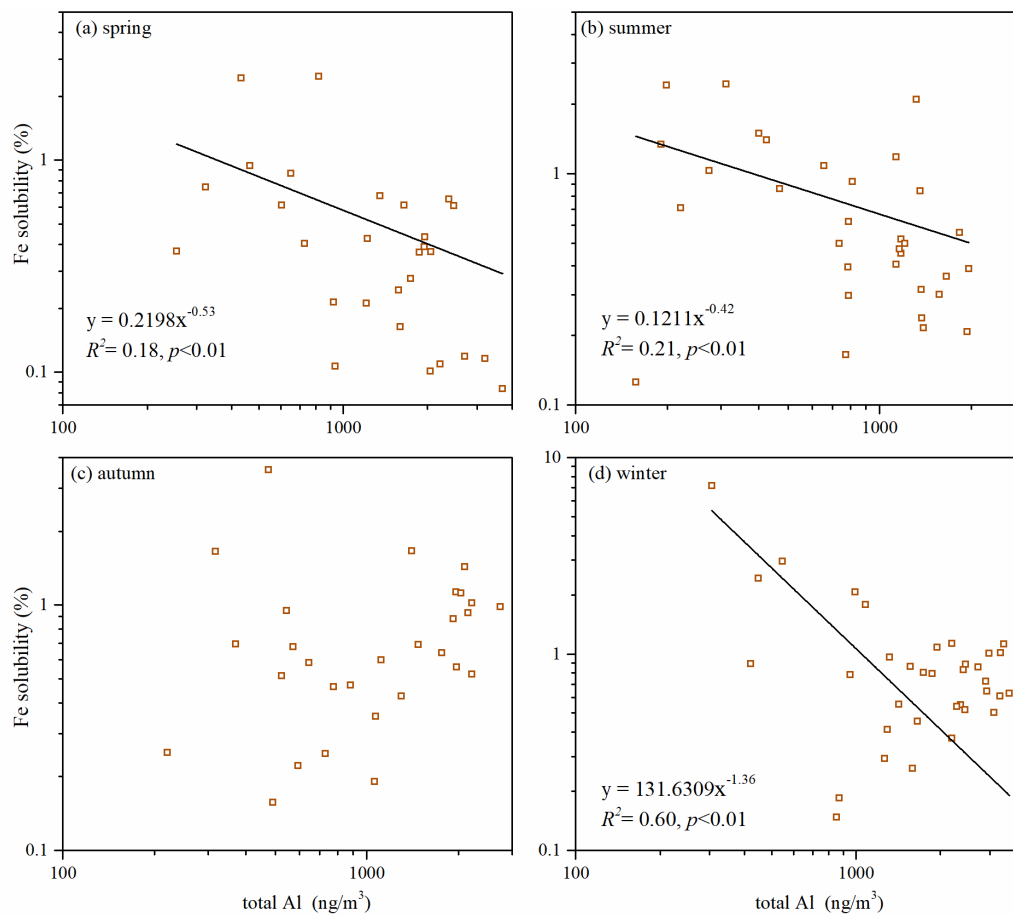

58

59 **Figure S8.** Fe solubility versus total Al for coarse particles in different seasons: (a) spring; (b)

60 summer; (c) autumn; (d) winter.

61

62

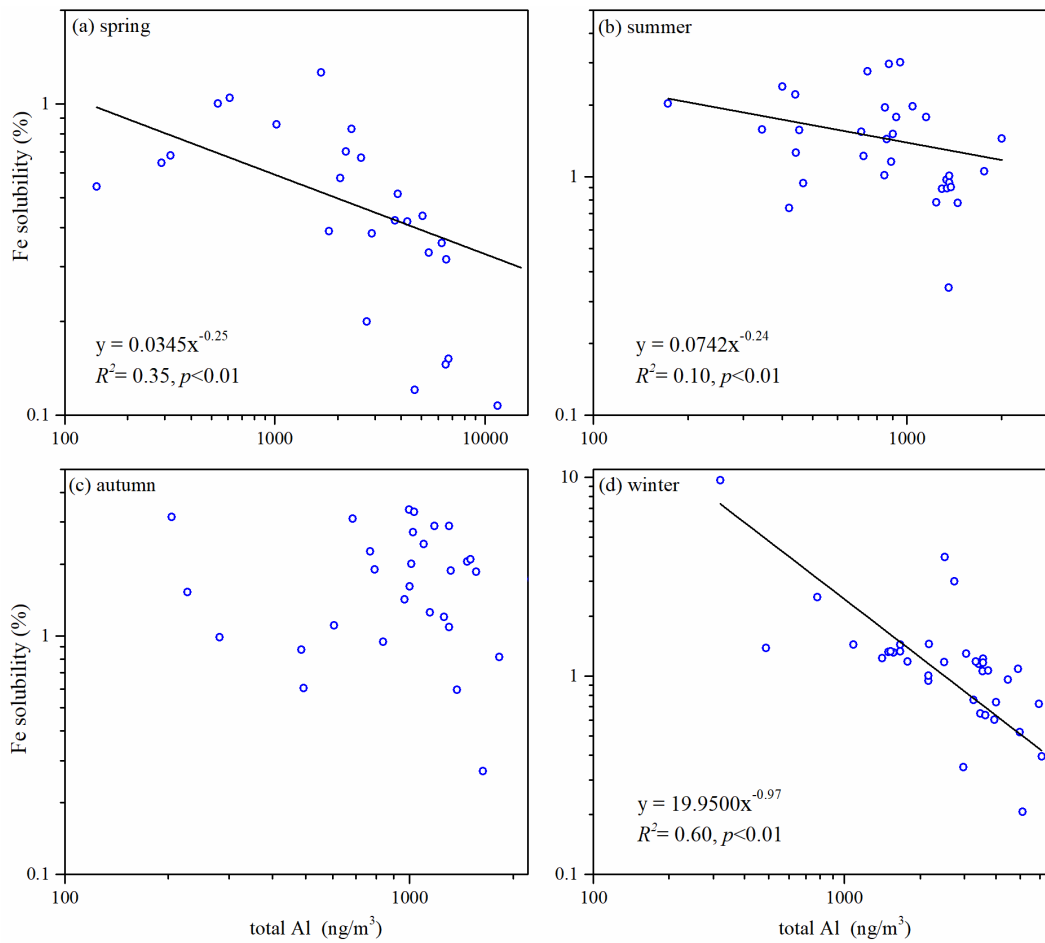

63

64 **Figure S9.** Fe solubility versus total Al for fine particles in different seasons: (a) spring; (b)

65 summer; (c) autumn; (d) winter.

66

67

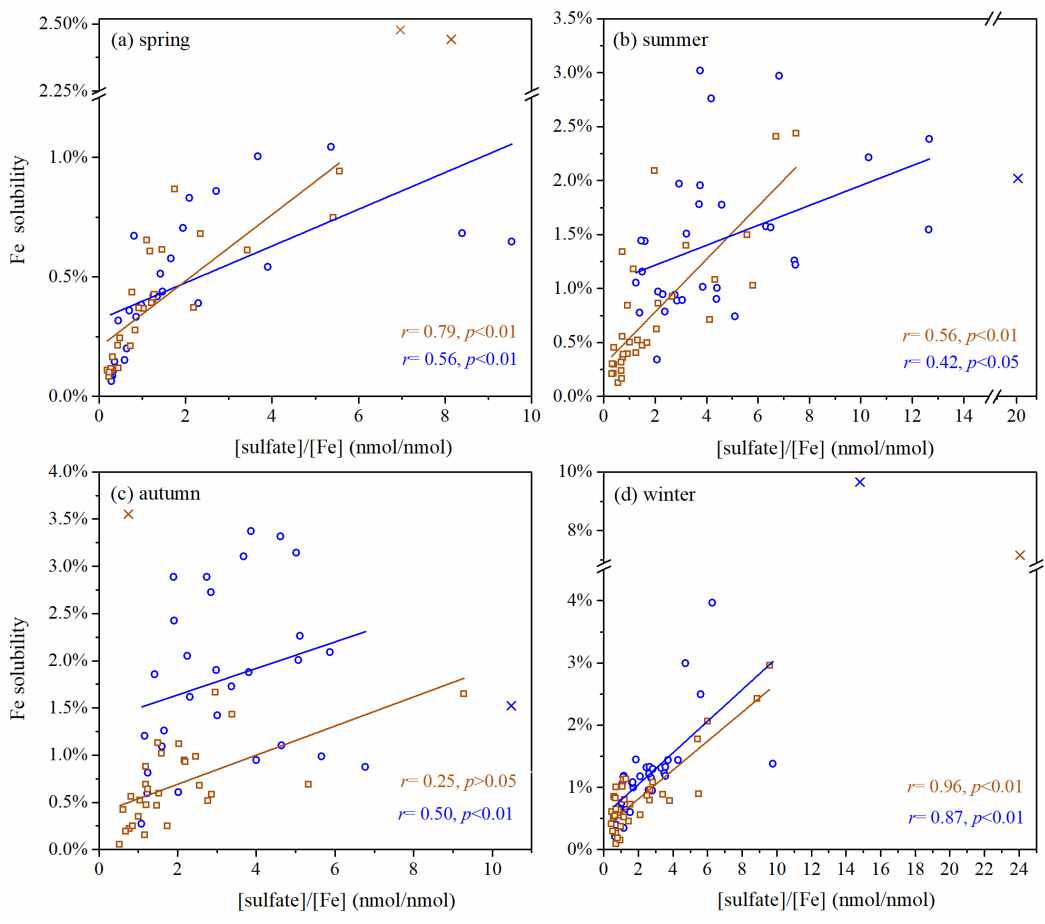

68

69 **Figure S10.** Fe solubility versus [sulfate]/[Fe] for fine and coarse particles in different seasons: (a)  
 70 spring; (b) summer; (c) autumn; (d) winter. Blue symbols represent fine particles and brown  
 71 symbols represent coarse particles. Cross symbols represent data points which are not included in  
 72 fittings.

73

74

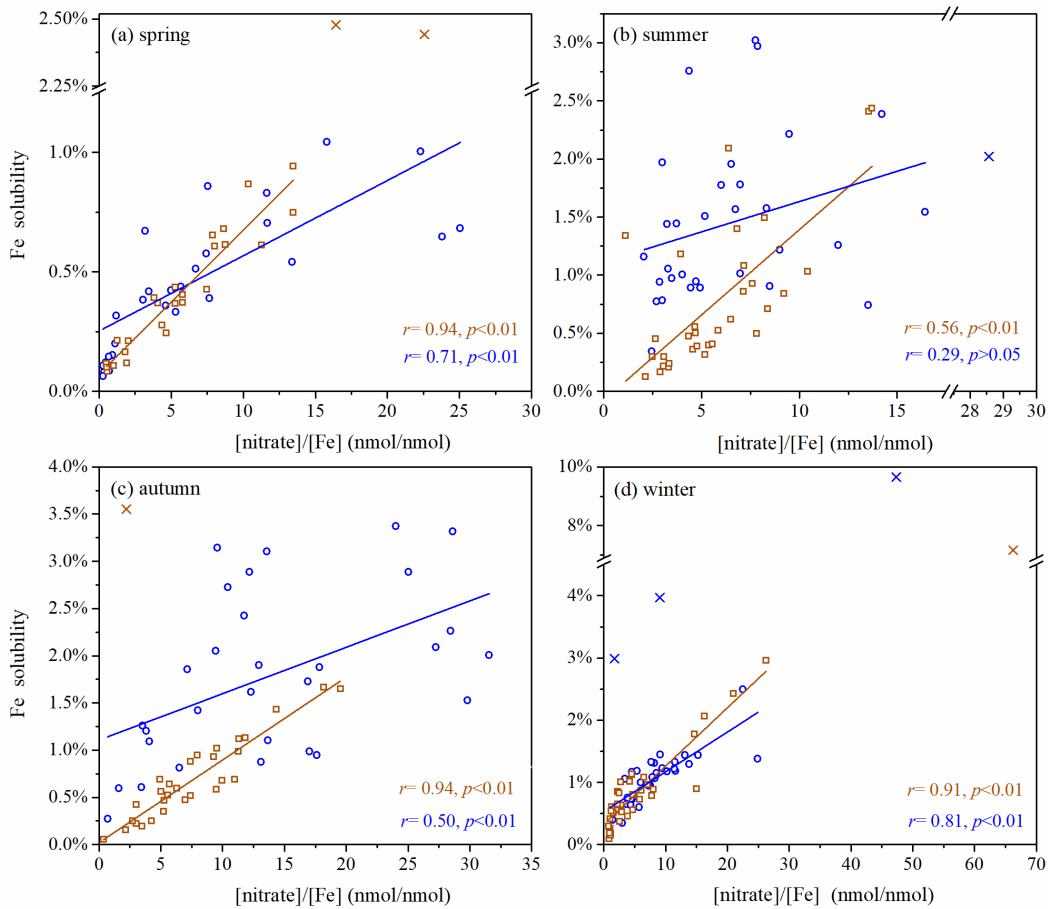

75

76 **Figure S11.** Fe solubility versus [nitrate]/[Fe] for fine and coarse particles in different seasons: (a)  
 77 spring; (b) summer; (c) autumn; (d) winter. Blue symbols represent fine particles and brown  
 78 symbols represent coarse particles. Cross symbols represent data points which are not included in  
 79 fittings.

80

81

82



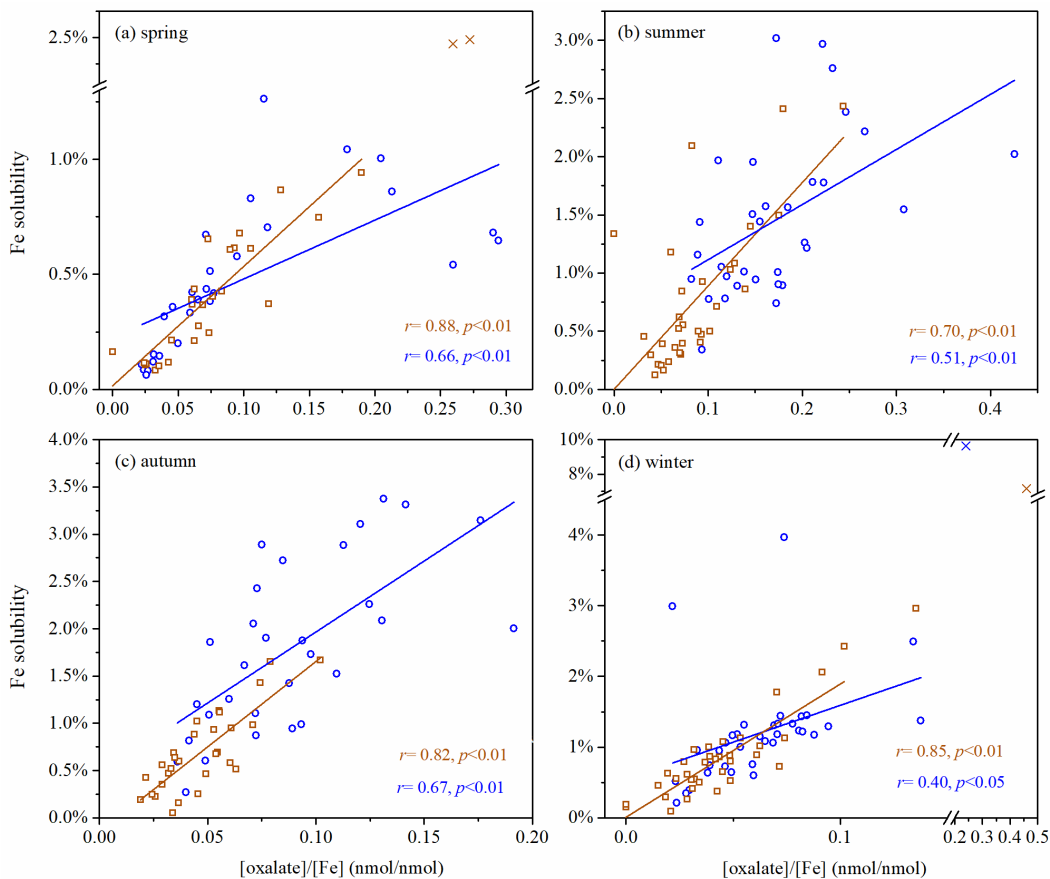

83

84 **Figure S12.** Fe solubility versus [oxalate]/[Fe] for fine and coarse particles in different seasons:

85 (a) spring; (b) summer; (c) autumn; (d) winter. Blue symbols represent fine particles and brown

86 symbols represent coarse particles. Cross symbols represent data points which are not included in

87 fittings.

88

89

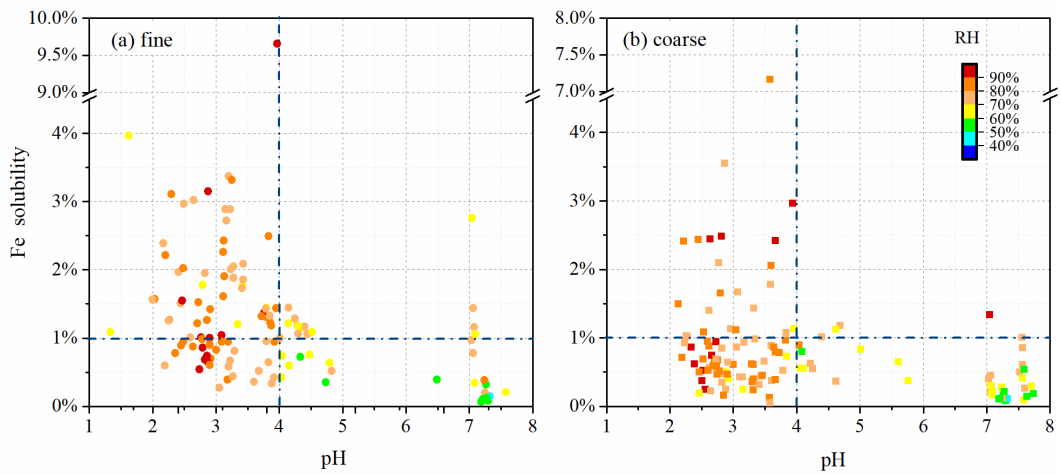

90

91 **Figure S13.** Fe solubility in different relative humidity (RH) ranges for (a) fine and (b) coarse  
 92 particles.

93

94

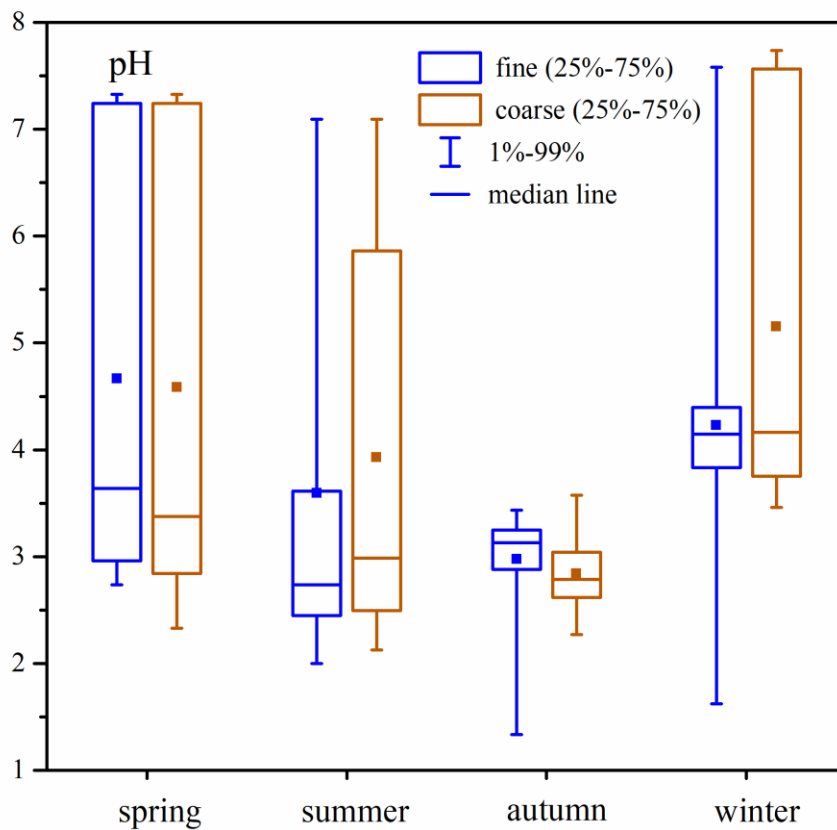

95

96 **Figure S14.** Seasonal variations of pH for fine and coarse particles in different seasons.

97

98
